# Supplementary material for: Effect of structural constraint on dynamic self-assembly behavior of PNIPAM-based nonlinear multihydrophilic block copolymers
Source: Royal Society of Chemistry journal article supplement (doi:10.1039/c2sm27183d), 2012-12-13
Supplement: c2sm27183d.pdf [file c2sm27183d.pdf]

## Supporting Information for

# Effect of structural constraint on dynamic self-assembly behavior of PNIPAM-based nonlinear multihydrophilic block copolymers

Shengtong Sun<sup>a</sup>, Peiyi Wu\*<sup>a</sup>, Weidong Zhang\*<sup>b</sup>, Wei Zhang\*<sup>c</sup>, and Xiulin Zhu<sup>c</sup>

<sup>a</sup>National Key Laboratory of Molecular Engineering of Polymers, Department of Macromolecular Science, and Laboratory of Advanced Materials, Fudan University, Shanghai 200433, China. E-mail: peiyiwu@fudan.edu.cn

<sup>b</sup>Center for Soft Condensed Matter and Interdisciplinary Research, Soochow University, Suzhou 215006, China. E-mail: weidongzhang5754@163.com

<sup>c</sup>Jiangsu Key Laboratory of Advanced Functional Polymer Design and Application, Department of Polymer Science and Engineering, College of Chemistry, Chemical Engineering and Materials Science, Soochow University, Suzhou 215123, China. E-mail: weizhang@suda.edu.cn

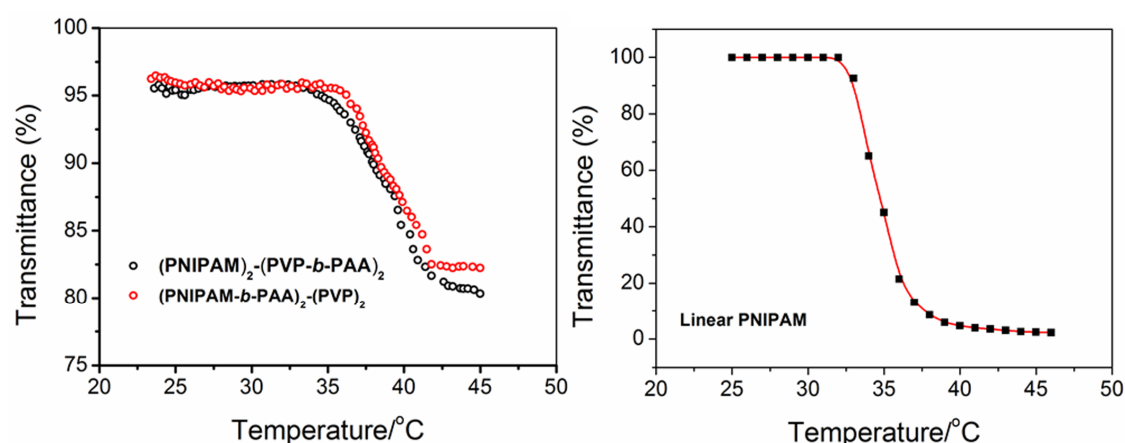

**Fig. S1** Temperature-dependent turbidity curves of the aqueous solutions of PNIPAM and MHBCs (0.5 mg/mL). The left figure for MHBC is reproduced from ref. 36 in the article.

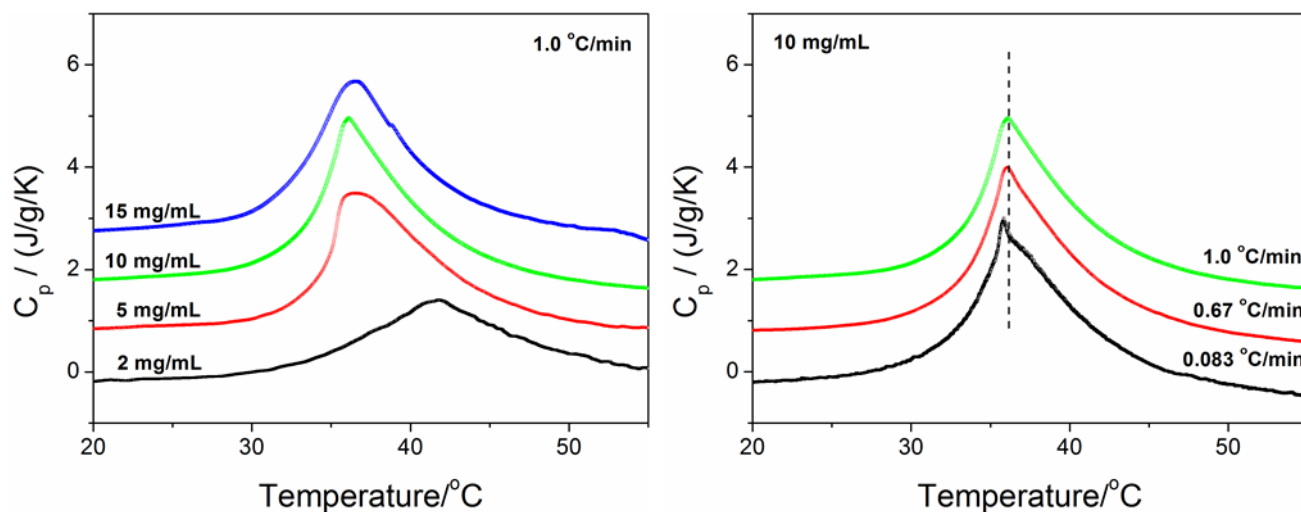

**Fig. S2** Micro-DSC heating curves of (PNIPAM-*b*-PAA)<sub>2</sub>-(PVP)<sub>2</sub> in H<sub>2</sub>O at different concentrations and scanning rates.

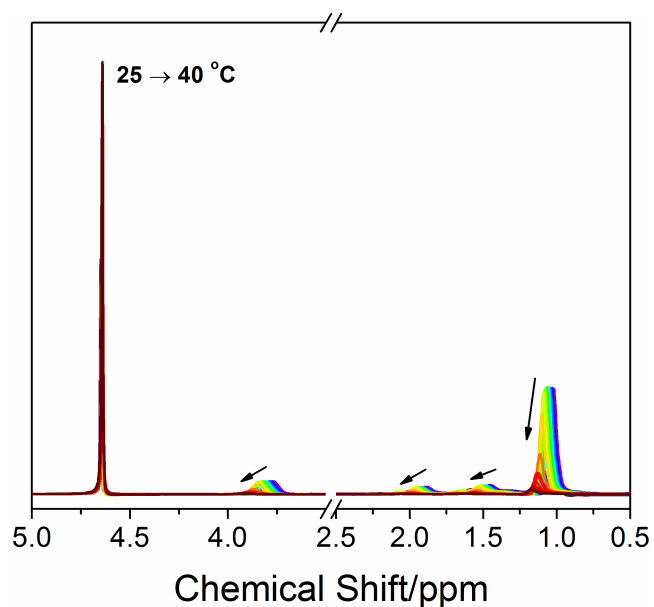

**Fig. S3** Normalized temperature-variable <sup>1</sup>H NMR spectra of linear PNIPAM in D<sub>2</sub>O (10 wt%) from 25 to 40  $^{\circ}$ C with an increment of 1  $^{\circ}$ C.
